# Supplementary material for: Brief Communication: A low-cost Arduino ® -based wire extensometer for earth flow monitoring
Source: Copernicus journal article supplement (doi:10.5194/nhess-17-881-2017), 2017-06-14
Supplement: Supplementary file 1 [file How_to_build.pdf › Supplementary material/How_to_build.pdf]

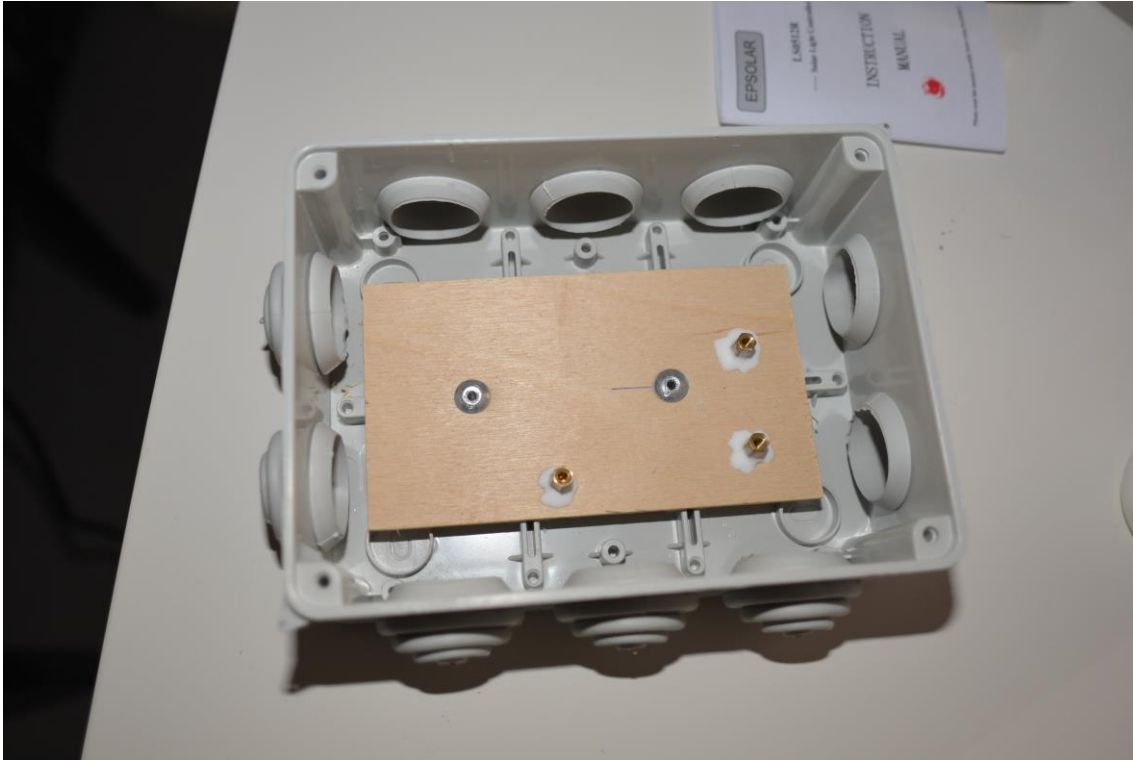

1) Fasten the wood plate to the inner box with two rivets. See the picture above for position. Glue the Arduino board supports to the wood plate. Define supports position as function of the position of the USB port of Arduino board.

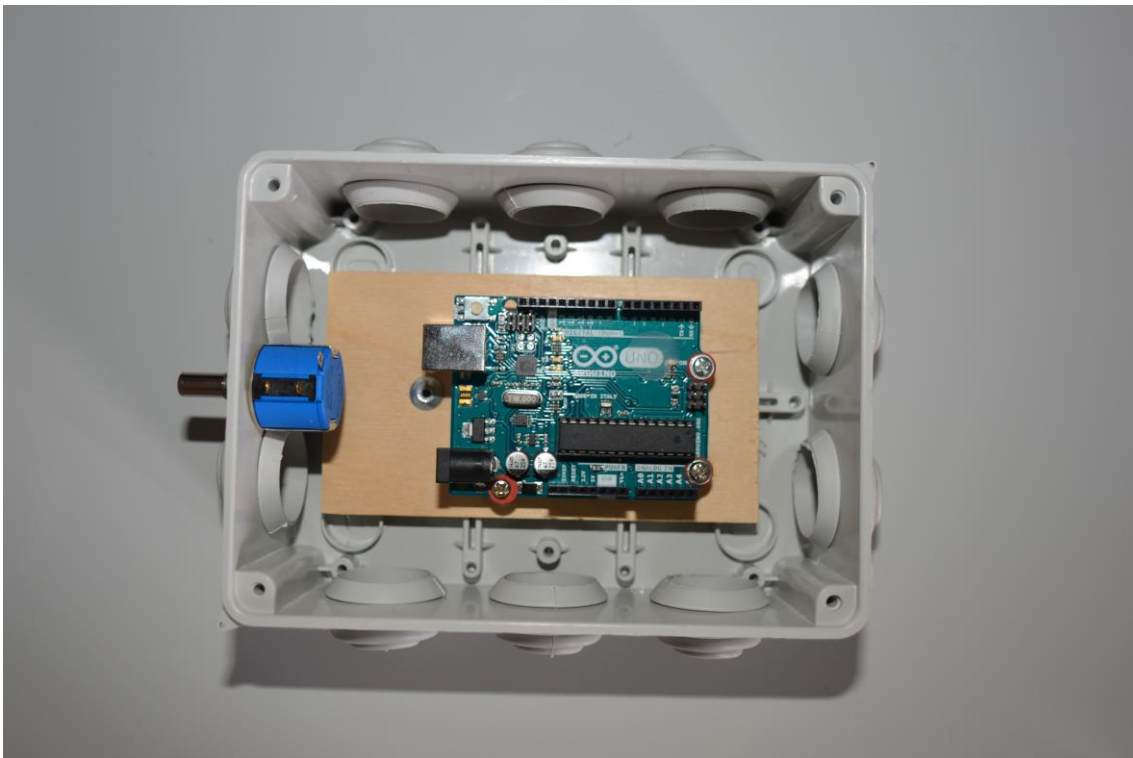

2) Fasten the Arduino board to the supports using specific screws. Make a hole on the shorter side of the inner box using a drill. The diameter has to match the diameter of the potentiometer screw. Fasten the potentiometer.

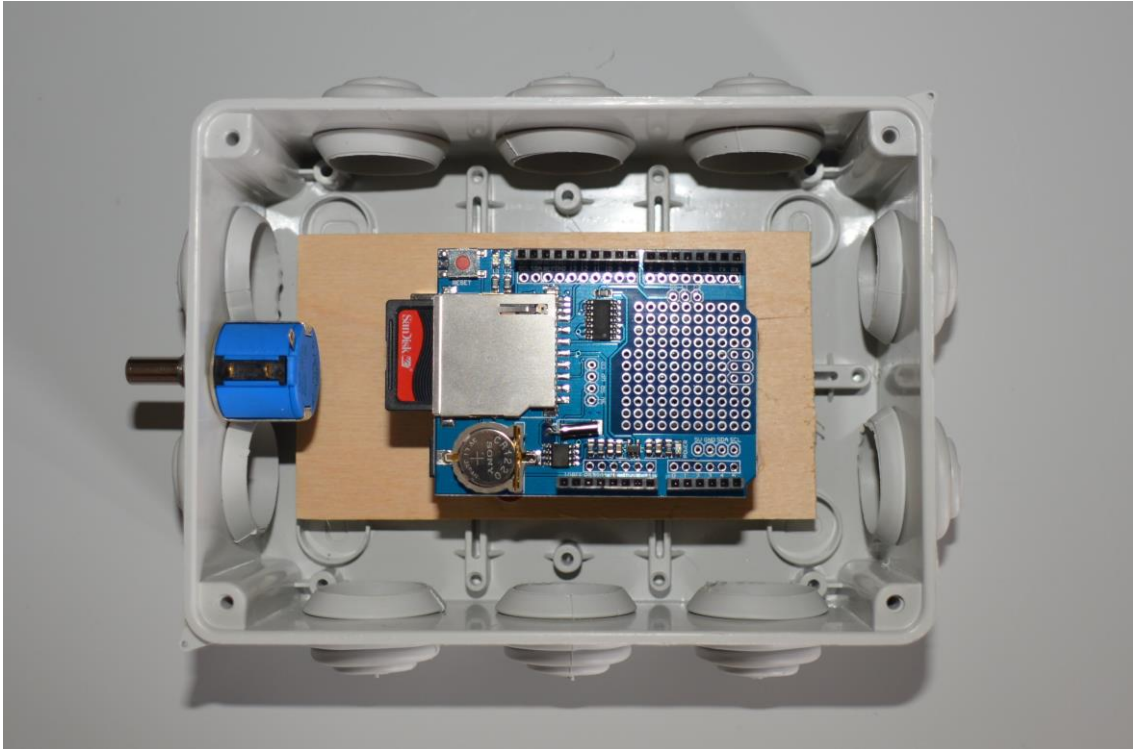

3) Attach the datalogging shield to the Arduino board.

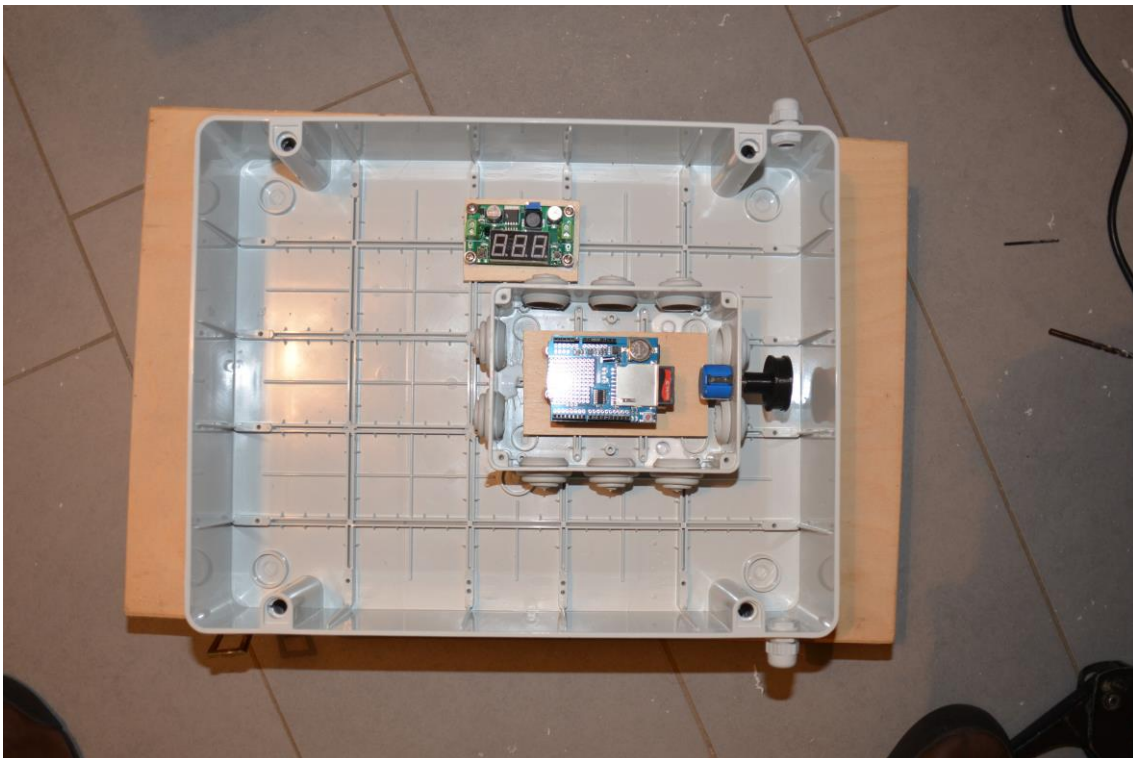

4) Fasten the inner box within the outer box using rivets. Using the configuration shown in the figure above, the system will work along left strike slip fault. Fasten a wood plate within the outer box using rivets and glue supports for the DC-DC converter. Fasten the DC-DC. Attach the pulley to the potentiometer using glue. Made two holes on the longer sides of the outer box and install the cable glands for passing the wire. Take care to the horizontal and vertical alignment of the cable glands with the pulley.

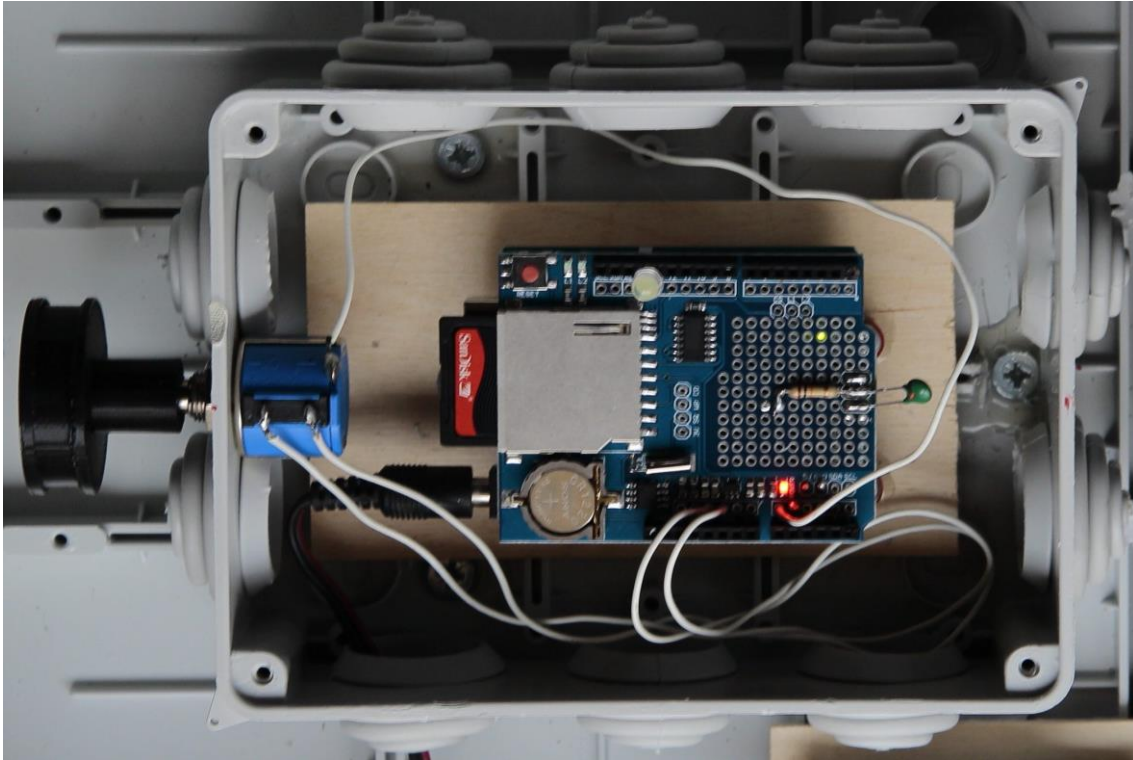

5) Solder the thermistor, the 10Kohm resistor and the cables of the potentiometer following the wiring diagram reported in the code. Install the led to pin 13 and attach the powering cable to the Arduino board. Make a hole along the longer side of the inner box and use a cable gland for passing the cable to the DC-DC.

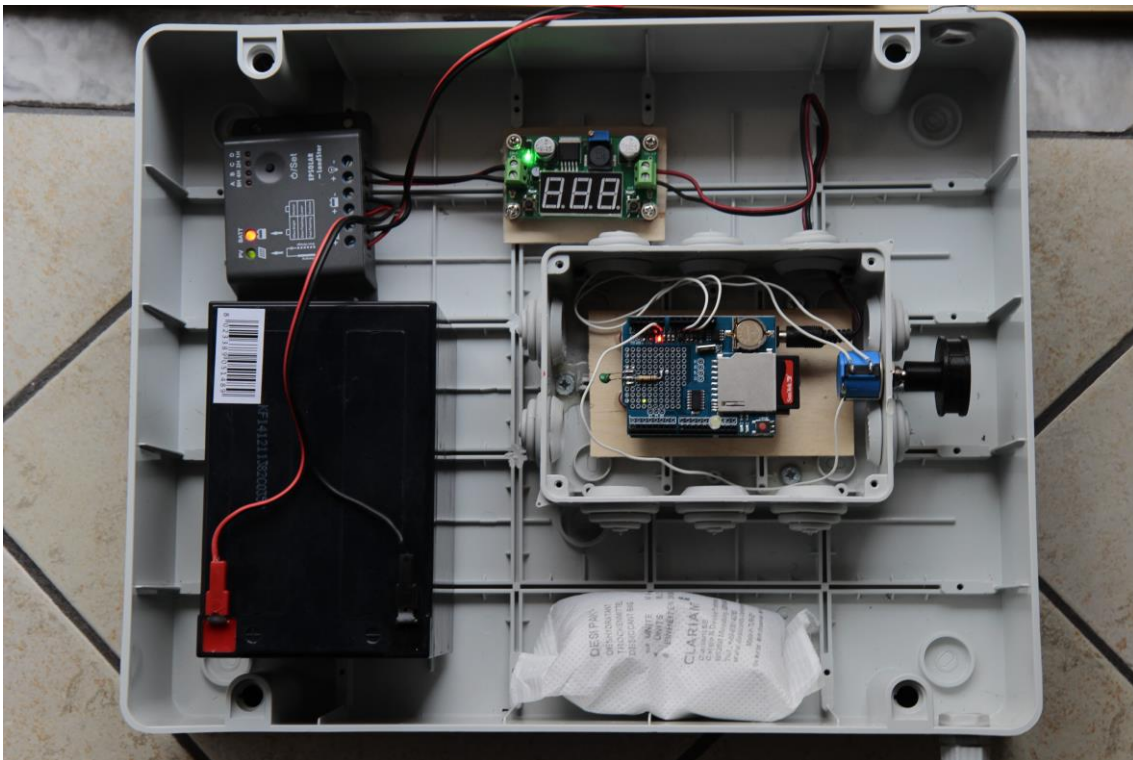

6) Fasten the regulator using rivets and connect the battery, the DC-DC and the solar panel. Make a hole along the longer side of the outer box and use a cable gland for padding the cable of the solar panel.
