# Supplementary material for: Brief Communication: A low-cost Arduino ® -based wire extensometer for earth flow monitoring
Source: Copernicus journal article supplement (doi:10.5194/nhess-17-881-2017), 2017-06-14
Supplement: Supplementary file [file nhess-17-881-2017-supplement-title-page.pdf › nhess-17-881-2017-supplement-title-page.pdf]

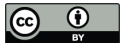

## *Supplement of*

# **Brief Communication: A low-cost Arduino<sup>®</sup>-based wire extensometer for earth flow monitoring**

**Luigi Guerriero et al.**

*Correspondence to:* Luigi Guerriero ([luigi.guerriero@unisannio.it](mailto:luigi.guerriero@unisannio.it))

- [nhess-17-881-2017-supplement-title-page.pdf](#)
- Supplementary material
  - [How\\_to\\_build.pdf](#)
  - [Pulley\\_33.obj](#)
  - [Pulley\\_33.skp](#)
  - [code](#)
    - \* [Ext\\_code.ino](#)

The copyright of individual parts of the supplement might differ from the CC BY 3.0 License.
